# Supplementary material
Source: PubMed Central journal article supplement (PMC8647860)
Supplement: NIHMS1749504-supplement-1749504_Sup_Fig.pdf [file NIHMS1749504-supplement-1749504_Sup_Fig.pdf]

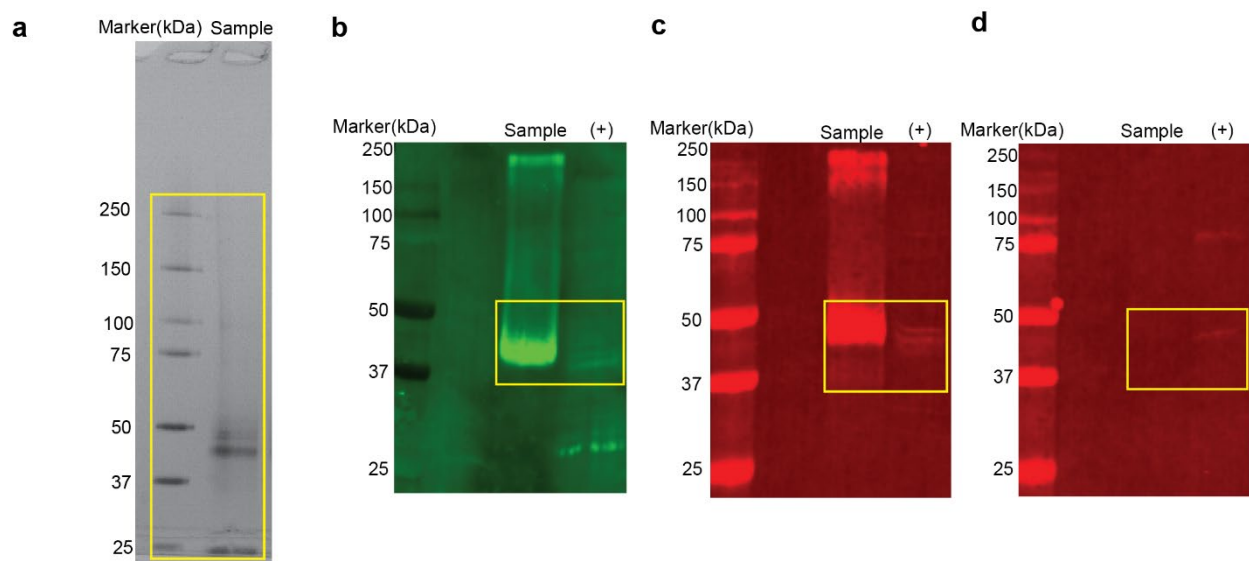

**Supplementary Fig. 1 Raw data for original silver-stained gel and western blots. a**, Original silver-stained gel (see Extended Data Fig. 1b). **b-d**, Original western blot results (see Extended Data Fig. 1d). Yellow boxes indicate how the gels were cropped.
